# Supplementary material for: Non-metal atom anchored BC3 sheet: a promising low-cost and high-activity catalyst for CO oxidation
Source: Royal Society of Chemistry journal article supplement (doi:10.1039/c7nj04877g), 2018-01-01
Supplement: c7nj04877g1.pdf [file c7nj04877g1.pdf]

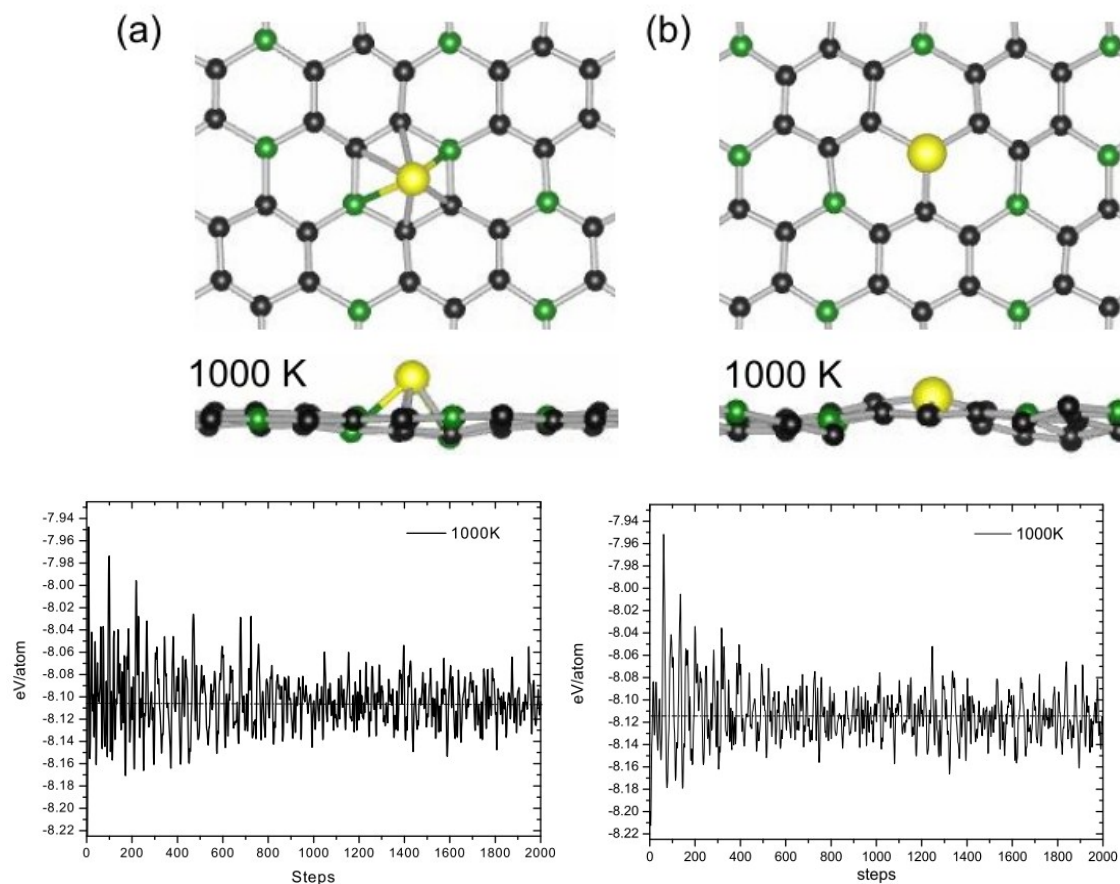

**Figure S1** Top and side views of the most stable configurations for (a) Si/pri-BC<sub>3</sub> and (b) Si-BC<sub>3</sub> from the first-principles molecular dynamics simulations at 1000K, respectively. Black, green and yellow balls represent C, B and Si atoms, respectively.

**Table S1** The adsorption energy ( $E_{\text{ads}}$ , in eV), bond length ( $d_3$ , in Å) and adsorption height ( $d_4$ , in Å) between adsorbed O<sub>2</sub> (or CO) and substrates NM-BC<sub>3</sub> sheet are calculated by GGA-PBE and DFT-D2 methods.

| Substrates         | Adsorbates     | GGA-PBE          |       |       | DFT-D2           |       |       |
|--------------------|----------------|------------------|-------|-------|------------------|-------|-------|
|                    |                | $E_{\text{ads}}$ | $d_3$ | $d_4$ | $E_{\text{ads}}$ | $d_3$ | $d_4$ |
| Si-BC <sub>3</sub> | O <sub>2</sub> | 1.47             | 1.45  | 1.78  | 1.53             | 1.45  | 1.77  |
|                    | CO             | 0.41             | 1.15  | 1.91  | 0.46             | 1.15  | 1.91  |
| P-BC <sub>3</sub>  | O <sub>2</sub> | 0.60             | 1.56  | 1.68  | 0.75             | 1.56  | 1.67  |
| N-BC <sub>3</sub>  | O <sub>2</sub> | 0.03             | 1.23  | 3.24  | 0.11             | 1.23  | 3.23  |
